# Supplementary material for: The type III TGF-β receptor suppresses breast cancer progression
Source: JCI journal article supplement (doi:10.1172/jci29293), 2006-12-08
Supplement: sd1 [file 1]

Supplementary Figure 1, Dong et al., 2006

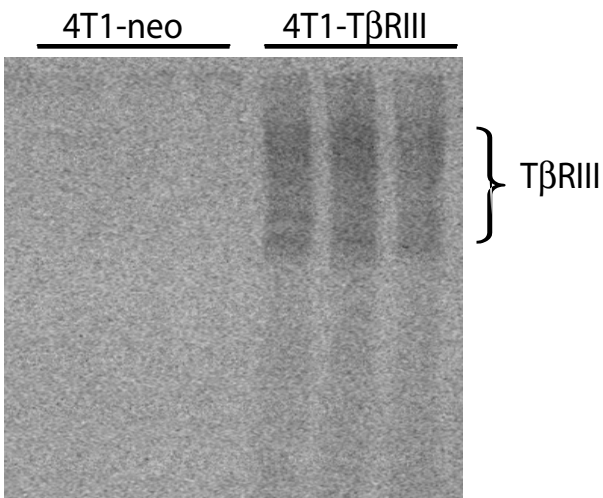

Supplementary Figure 1. Expression of T $\beta$ RIII in 4T1 cells.

A  $[^{125}\text{I}]\text{TGF-}\beta 1$  binding and cross-linking assay followed by immunoprecipitation with anti-T $\beta$ RIII antibody was performed to confirm the expression of T $\beta$ RIII.

Supplementary Figure 2. Dong et al., 2006

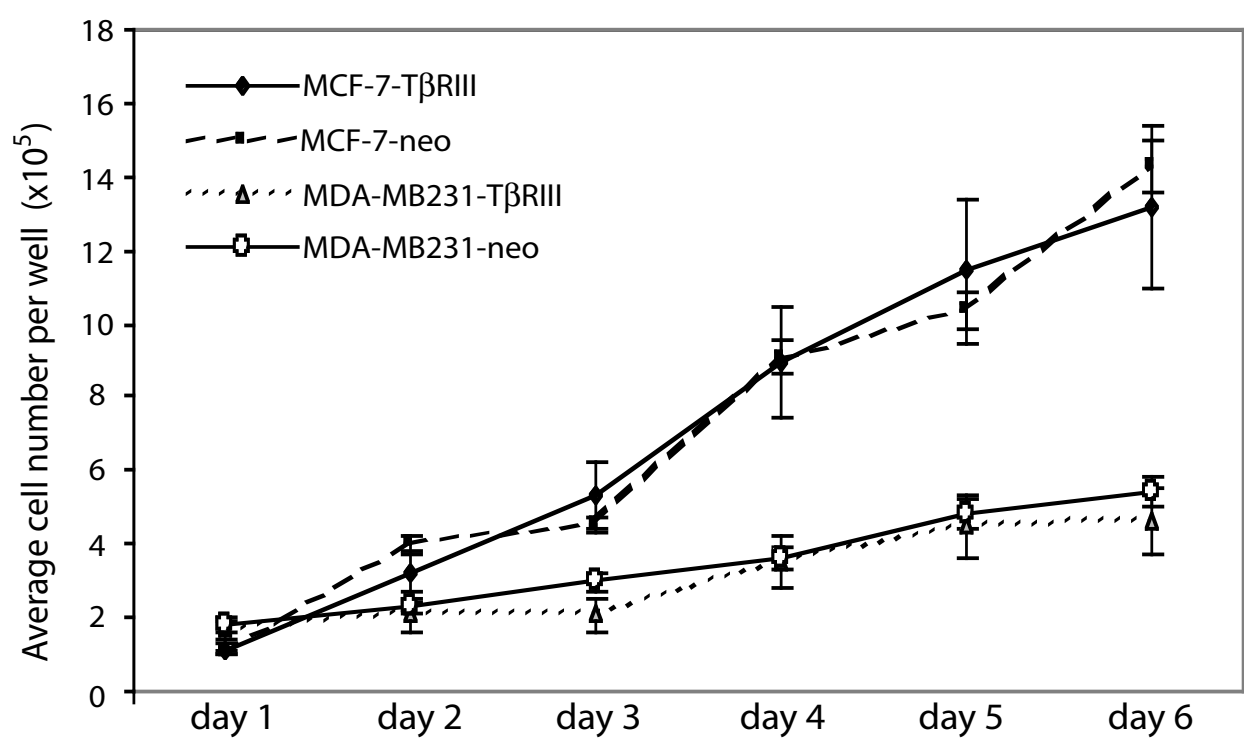

Supplementary Figure 2. Effect of TβRIII on proliferation of breast cancer cells. 5,000 cells were seeded in a 6-well plate. After a 48-hour incubation, cells were collected and counted using a Coulter Counter every day for 6 days. This experiment was repeated in triplicate three times. Data is presented as mean ± S.D.

Supplementary Figure 3. Soluble T $\beta$ RIII expression in human breast epithelial and breast cancer cell lines; and in human plasma. A. 250,000 cells were seeded. After a 48-hour incubation, cells were placed in serum free media for 24 hours, conditioned media from each cell line collected, cross-linked with iodinated TGF $\beta$ -1 and sT $\beta$ RIII specifically immunoprecipitated with an antibody to the extracellular domain. sT $\beta$ RIII was detected in all breast epithelial and breast cancer cell lines tested. B. Human plasma (2.0 ml in left panel, 0.75 ml in right panel) from normal donors or breast cancer patients was cross-linked with iodinated TGF $\beta$ -1 and sT $\beta$ RIII specifically immunoprecipitated with an antibody to the extracellular domain. Recombinant human sT $\beta$ RIII (rh sT $\beta$ RIII) was run as a positive control for both sets of samples. In addition, normal human donor plasma sample number 3 was run as a positive control for the breast cancer plasma samples (on right). T $\beta$ RIII was detected in plasma from normal donors, but not in plasma from breast cancer patients.

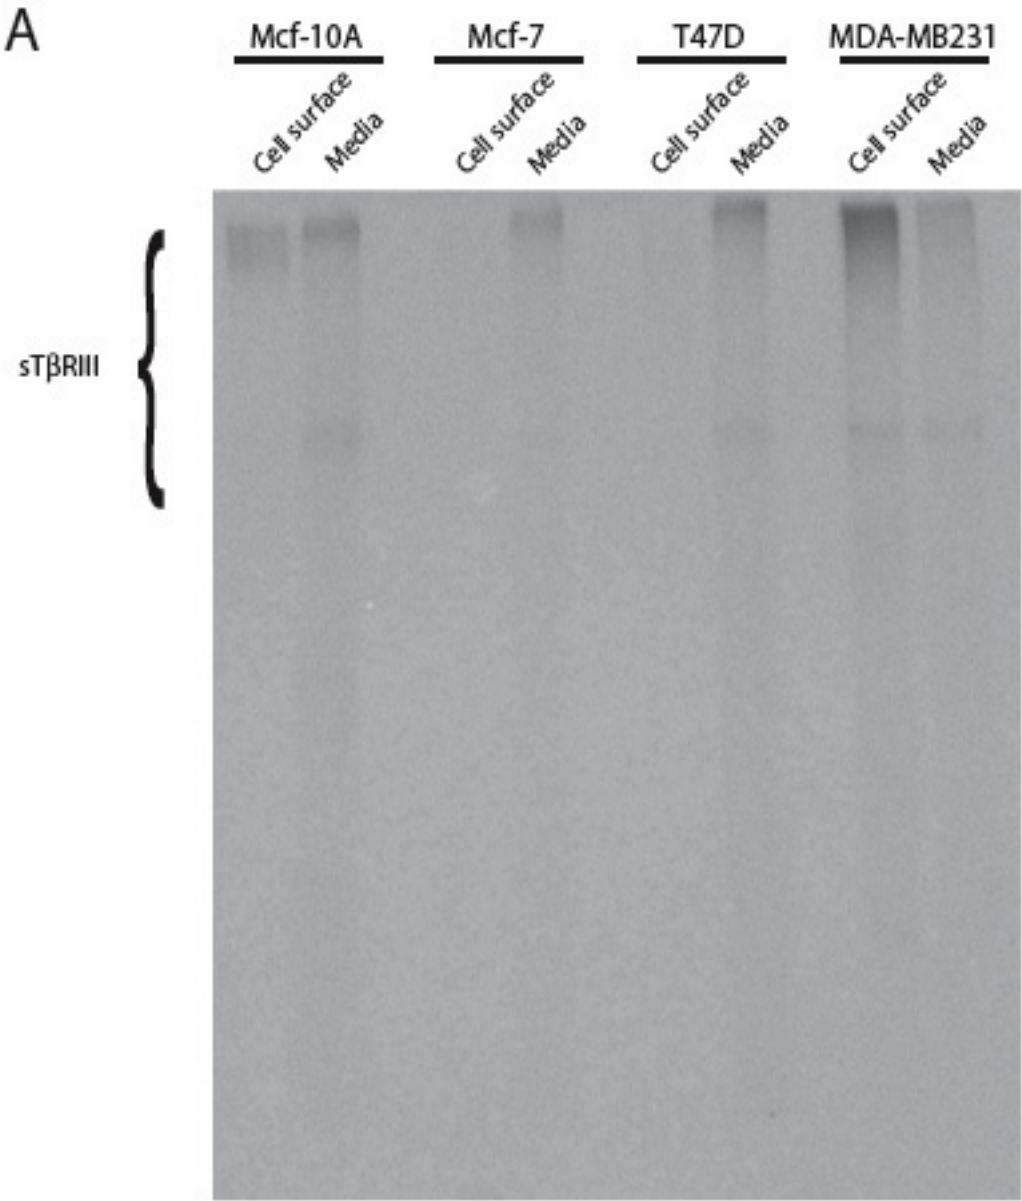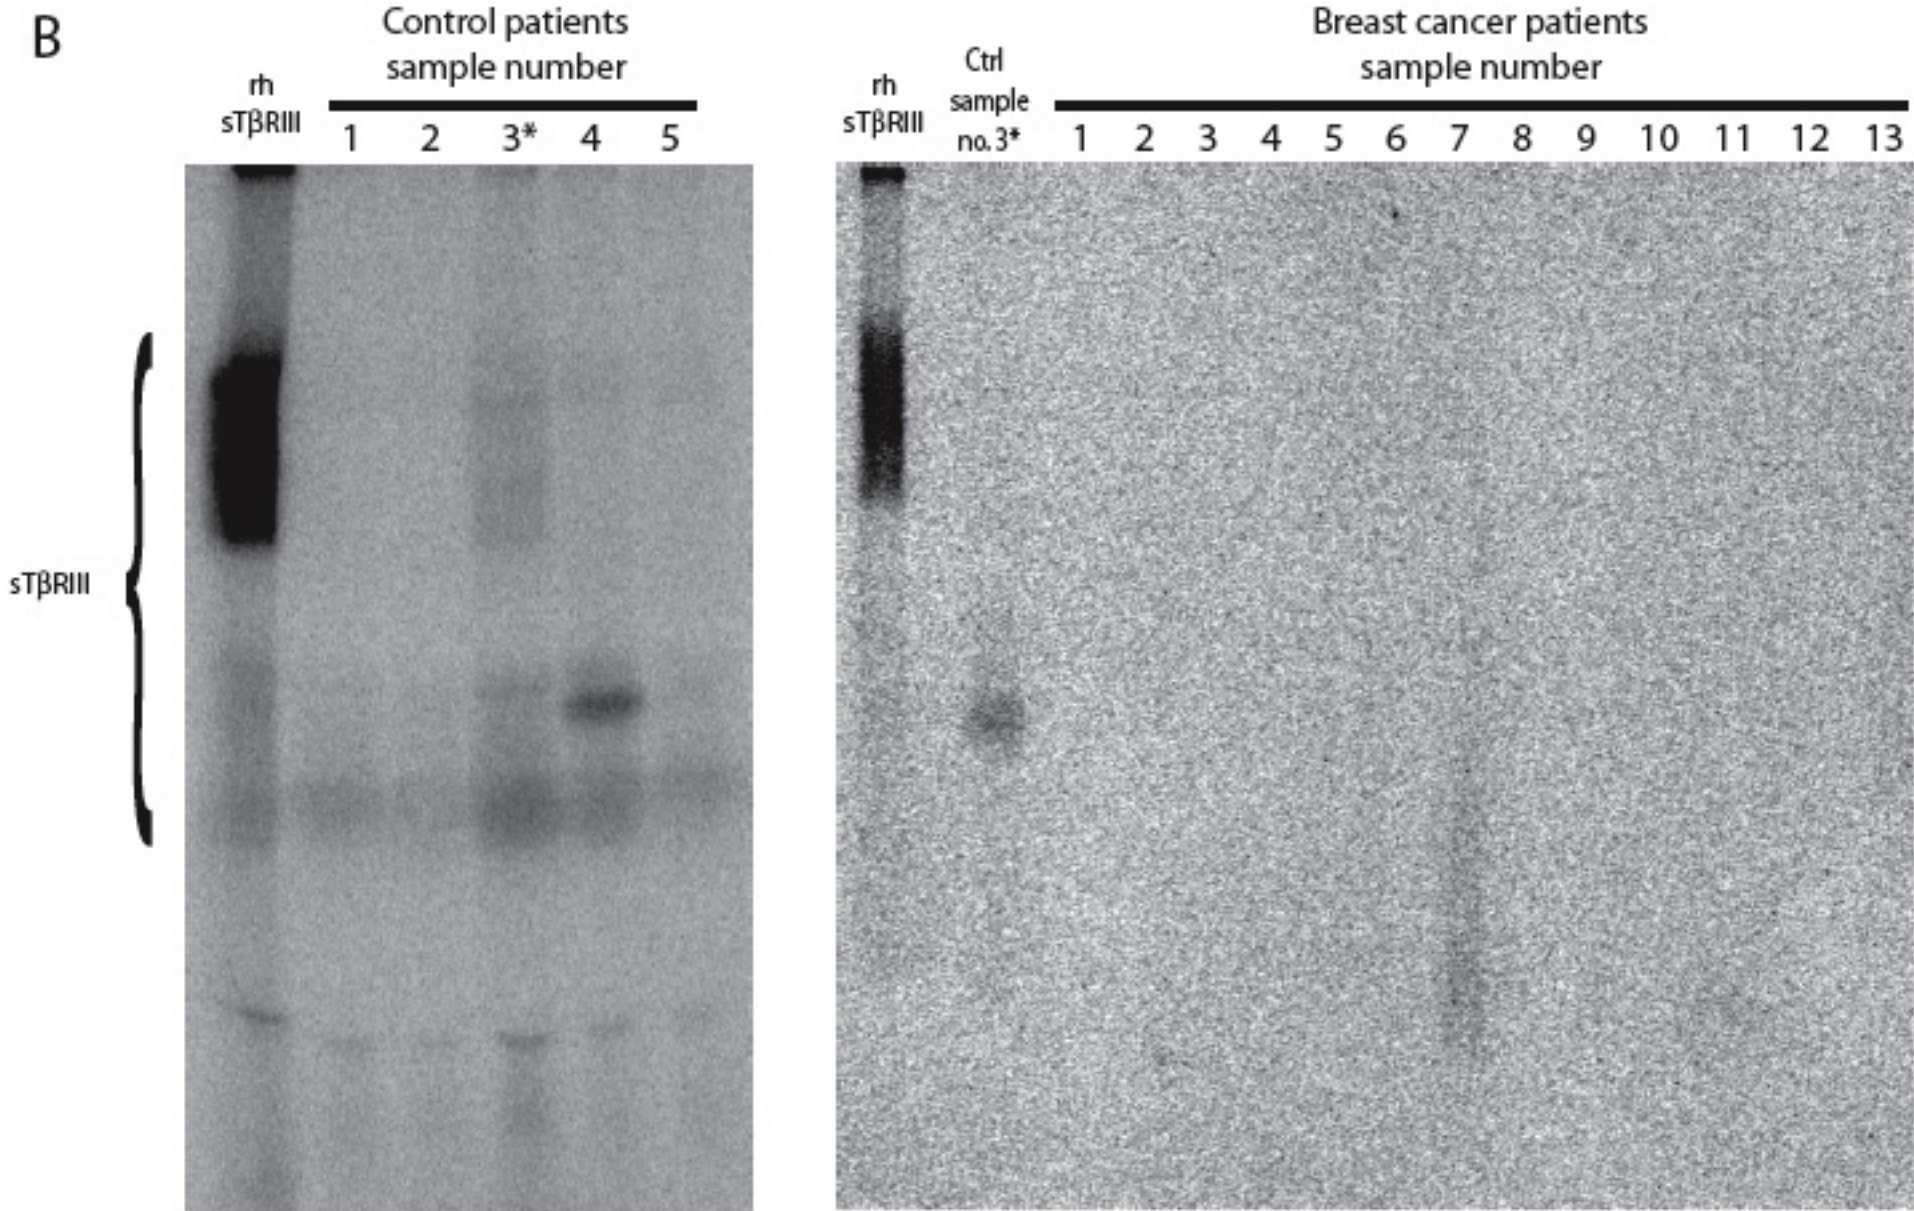

Supplementary Table 1, Dong et al., 2006

|         |         |                        |
|---------|---------|------------------------|
| exon 2  | forward | CTCCAGCCTGGGTAACAGAG   |
|         | reverse | TGAAGTGACTGGACGAGACG   |
| exon 3  | forward | CCCCAGAAGAGAAGAAAAGGA  |
|         | reverse | AGTGGTTTGATCACCTTGC    |
| exon 4  | forward | TTTGGACTCTGGCATTATTTCA |
|         | reverse | TTCCAGAGGCTGCTCTGAGT   |
| exon 5  | forward | TGATTCCTTGCCCTAACCAC   |
|         | reverse | TTATGATTGAGCTCCGGTGA   |
| exon 6  | forward | TGTAGGACGGGCTACACCTC   |
|         | reverse | CTGCCATTTGCTCAGTTTCA   |
| exon 7  | forward | GAGAGTCCAAAGAGGCAGGA   |
|         | reverse | GAAGACTTGGAAGAGGGGAGA  |
| exon 8  | forward | TTCCTCACTGAAAAGCTTCA   |
|         | reverse | TCGTTCTTAGCCCAAGGAAA   |
| exon 9  | forward | AGATGCAGACTAGGGCCAGA   |
|         | reverse | GCAGAGGAGATGGGAGATGA   |
| exon 10 | forward | GGGGTGAAAACCCTCTTCAT   |
|         | reverse | CCTTGGAAGACCAGGCAAT    |
| exon 11 | forward | TGAAGGATGAAGGCCCTGTA   |
|         | reverse | GCAGAACCAAACACACATGG   |
| exon 12 | forward | GAGCCAATCCCTCATCAGAC   |
|         | reverse | CAGGGCCTTCATCCTTCATA   |
| exon 13 | forward | CCTGCAAGACCTTGGGATTA   |
|         | reverse | AAAGCAGCGTGTCTCTGAA    |
| exon 14 | forward | CCTCCCAAAGCACACCTTTA   |
|         | reverse | TCTCCAGGTTATTTGGTGTTC  |
| exon 15 | forward | TTAGGAAAGCCCAGGAGGTT   |
|         | reverse | TGGAGAGCCTATGCAACTGA   |
| exon 16 | forward | GAGTGTCTATTGTGTGGCAGGA |
|         | reverse | TCTTCATTGCATTCTCCGATT  |
| exon 17 | forward | GAACCAAATCCAGCCCTCT    |
|         | reverse | AATGGCAAATGCGGAATAAA   |

Supplementary Table 1. Sequence of primers used to PCR amplify the 16 coding exons of human T $\beta$ RIII.

Supplementary Table 2, Dong et al., 2006

|                |         |                       |
|----------------|---------|-----------------------|
| T $\beta$ RI   | forward | ACGGCGTTACAGTGTCTG    |
|                | reverse | GGTGTGGCAGATATAGACC   |
| T $\beta$ RII  | forward | AGCAACTGCAGCATCACCTC  |
|                | reverse | TGATGTCTGAGAAGATGTCC  |
| T $\beta$ RIII | forward | CTGTTCAACCCGACCTGAAAT |
|                | reverse | CGTCAGGAGGCACACACTTA  |
| GAPDH          | forward | GAGTCAACGGATTTGGTCGT  |
|                | reverse | TTGATTTTGGAGGGATCTCG  |

Supplementary Table 2. Sequence of primers used for RT- PCR.
